# Supplementary material for: Economic Burden of Postoperative Neurocognitive Disorders Among US Medicare Patients
Source: PubMed Central journal article supplement (PMC7395237; doi:10.1001/jamanetworkopen.2020.8931), 2020-07-31
Supplement: jamanetwopen-3-e208931-s001.pdf [file jamanetwopen-3-e208931-s001.pdf]

## Supplementary Online Content

Boone MD, Sites B, von Recklinghausen FM, Mueller A, Taenzer AH, Shaefi S. Economic Burden of Postoperative Neurocognitive Disorders Among US Medicare Patients. *JAMA Netw Open*. 2020;3(7):e208931. doi:10.1001/jamanetworkopen.2020.8931

**eTable 1.** Pre-existing Neurocognitive Diagnoses Definitions

**eTable 2.** Bundled Payments for Care Improvement Advanced Model Year 1-Episode Definitions

**eTable 3.** *International Classification of Diseases, Ninth or Tenth Revision*, Diagnosis Codes for Perioperative Neurocognitive Disorders

**eAppendix.** Statistical Methods

This supplementary material has been provided by the authors to give readers additional information about their work.

**eTable 1.** Pre-existing Neurocognitive Diagnoses Definitions

Pre-existing neurocognitive diagnoses defined based on the International Classification of Diseases Ninth or Tenth Revision (ICD 9/10) Codes

| Type   | Description                                                                      | Code(s)                                                                                           |
|--------|----------------------------------------------------------------------------------|---------------------------------------------------------------------------------------------------|
| ICD-10 | Cognitive impairment                                                             | G31.84                                                                                            |
| ICD-10 | Age related cognitive decline                                                    | R41.81                                                                                            |
| ICD-10 | Altered mental status                                                            | R41.82                                                                                            |
| ICD-10 | Cerebral degeneration                                                            | G31.9                                                                                             |
| ICD-10 | Unspecified symptoms and signs involving cognitive functions and awareness       | R41.9                                                                                             |
| ICD-10 | Cognitive deficits following (sequelae of) cerebral hemorrhage or infarction     | I69.01-, I69.11-, I69.21-, I69.31-, I69.81-, I69.91-                                              |
| ICD-10 | Cognitive impairment due to intracranial or head injury                          | S06.-                                                                                             |
| ICD-10 | Dementia                                                                         | F01.-, F02.-, F03                                                                                 |
| ICD-10 | Mild memory disturbance                                                          | F06.8                                                                                             |
| ICD-10 | Neurologic neglect syndrome                                                      | R41.4                                                                                             |
| ICD-10 | Personality change, nonpsychotic                                                 | F68.8                                                                                             |
| ICD-9  | Cognitive impairment                                                             | 331.83                                                                                            |
| ICD-9  | Altered mental status                                                            | 780.97                                                                                            |
| ICD-9  | Memory loss                                                                      | 780.93                                                                                            |
| ICD-9  | Cerebral degeneration                                                            | 331.0-331.9                                                                                       |
| ICD-9  | Change in mental status                                                          | 780.97                                                                                            |
| ICD-9  | Cognitive deficits following (late effects of) cerebral hemorrhage or infarction | 438.0                                                                                             |
| ICD-9  | Cognitive impairment due to intracranial or head injury                          | 850-854, 959.01                                                                                   |
| ICD-9  | Cognitive impairment due to late effect of intracranial injury                   | 907.0                                                                                             |
| ICD-9  | Cognitive impairment due to skull fracture                                       | 800-801, 803-804                                                                                  |
| ICD-9  | Dementia                                                                         | 290.0-290.43, 294.20-294.21                                                                       |
| ICD-9  | Unspecified persistent mental disorders due to conditions classified elsewhere   | 294.9                                                                                             |
| ICD-9  | Mild memory disturbance                                                          | 310.89                                                                                            |
| ICD-9  | Neurologic neglect syndrome                                                      | 781.8                                                                                             |
| ICD-9  | Personality change, nonpsychotic                                                 | 310.1                                                                                             |
| ICD-9  | Dementia                                                                         | 046.1, 046.3, 290.x, 291.2, 294.1, 294.11, 294.8, 331.x (except 331.83), 332.0, 333.0, 333.4, 797 |
| ICD-9  | Cognitive signs and symptoms                                                     | 799.5x                                                                                            |

**eTable2.** Bundled Payments for Care Improvement Advanced Model Year 1-Episode Definitions  
*Inpatient Clinical Episodes: Medicare Severity Diagnosis Related Groups (MS-DRG) Trigger Codes effective per the 2018 Inpatient Prospective Payment System (IPPS) Final Rule*

| Clinical Group  | Clinical Episode                                              | DRG # 1 | DRG # 2 | DRG # 3 | DRG # 4 | DRG # 5 | DRG # 6 | DRG # 7 | DRG # 8 |
|-----------------|---------------------------------------------------------------|---------|---------|---------|---------|---------|---------|---------|---------|
| Orthopedic      | Back and neck except spinal fusion                            | 518     | 519     | 520     |         |         |         |         |         |
| Cardiac         | Coronary artery bypass graft surgery                          | 231     | 232     | 233     | 234     | 235     | 236     |         |         |
| Cardiac         | Cardiac defibrillator                                         | 222     | 223     | 224     | 225     | 226     | 227     |         |         |
| Cardiac         | Cardiac valve                                                 | 216     | 217     | 218     | 219     | 220     | 221     | 266     | 267     |
| Orthopedic      | Cervical spinal fusion                                        | 471     | 472     | 473     |         |         |         |         |         |
| Orthopedic      | Combined anterior posterior spinal fusion                     | 453     | 454     | 455     |         |         |         |         |         |
| Orthopedic      | Double joint replacement of the lower extremity               | 461     | 462     |         |         |         |         |         |         |
| Orthopedic      | Fractures femur and hip/pelvis                                | 533     | 534     | 535     | 536     |         |         |         |         |
| Orthopedic      | Hip and femur procedures except major joint                   | 480     | 481     | 482     |         |         |         |         |         |
| Orthopedic      | Lower extremity and humerus procedure except hip, foot, femur | 492     | 493     | 494     |         |         |         |         |         |
| General Surgery | Major bowel procedure                                         | 329     | 330     | 331     |         |         |         |         |         |
| Orthopedic      | Major joint replacement of the lower extremity                | 469     | 470     |         |         |         |         |         |         |
| Orthopedic      | Major joint replacement of upper extremity                    | 483     |         |         |         |         |         |         |         |
| Cardiac         | Pacemaker                                                     | 242     | 243     | 244     |         |         |         |         |         |
| Cardiac         | Percutaneous coronary intervention                            | 246     | 247     | 248     | 249     | 250     | 251     | 273     | 274     |
| Orthopedic      | Spinal fusion (non-cervical)                                  | 459     | 460     |         |         |         |         |         |         |

**eTable 3.** *International Classification of Diseases, Ninth or Tenth Revision, Diagnosis Codes for Perioperative Neurocognitive Disorders*

| <b>Perioperative Neurocognitive Disorder</b>                         | <b>ICD 9 Diagnosis</b>                                                    | <b>ICD 10 Diagnosis</b>  |
|----------------------------------------------------------------------|---------------------------------------------------------------------------|--------------------------|
| Delirium                                                             | '29011', '2903', '29041', '2910', '2930', '2931', '2900', '29389', '2899' | 'R410', 'F0390', 'F0391' |
| Mild Cognitive Impairment                                            | '33183'                                                                   | 'G3184'                  |
| Dementia                                                             | '29011', '2903', '29041', '2900'                                          | 'F0390', 'F0391'         |
| <i>Abbreviations: ICD = International Classification of Diseases</i> |                                                                           |                          |

## eAppendix. Statistical Methods

We used linear mixed models to characterize Medicare post acute payments within and between hospitals. Level one variables were patient predictors including presence of an neurocognitive disorder, age in years, gender, length of stay, Hierarchical Condition Category (HCC) score, area deprivation index, surgical bundle and discharge to home. Level 2 included hospital predictors included region of the country, rural or urban, ownership, academic medical center and the number of beds. All models accounted for the clustering of patients within hospitals using a random effect. We characterized the hospitals' effect by using the variance decomposition from the random effects term in a null model (Model1) with Medicare post visit payments entered as the outcome variable.

| <b>Model 1<br/>Intercept Only</b> |                                                                  |                |
|-----------------------------------|------------------------------------------------------------------|----------------|
| <b>Effect</b>                     | <b><math>\beta</math> Estimate<br/>(95% Confidence Interval)</b> | <b>P Value</b> |
| Intercept                         | \$17036.00 (16850.00,17222.00)                                   | <.0001         |

In Model 2, only PND was included as a fixed effect, including the clustering of hospital as a random effect.

| <b>Model 2<br/>Intercept + PND Fixed Effect</b> |                                                                  |                |
|-------------------------------------------------|------------------------------------------------------------------|----------------|
| <b>Effect</b>                                   | <b><math>\beta</math> Estimate<br/>(95% Confidence Interval)</b> | <b>P Value</b> |
| Intercept                                       | \$16468 (16286, 16650)                                           | <.0001         |
| PND                                             | \$23589 (23378, 23800)                                           | <.0001         |
| No PND                                          | [REFERENCE]                                                      |                |

In Model 3, we assessed the relationship between Level 1 characteristics in a multivariable model by setting payments as the outcome specifying fixed linear effects for the patient (Level 1).

| <b>Model 3<br/>Patient Fixed Effects</b> |                                                                  |                |
|------------------------------------------|------------------------------------------------------------------|----------------|
| <b>Effect</b>                            | <b><math>\beta</math> Estimate<br/>(95% Confidence Interval)</b> | <b>P Value</b> |
| Intercept                                | -\$5903.20 (-6267.74, -5538.65)                                  | <.0001         |
| PND                                      | \$17275.00 (17058.00, 17492.00)                                  | <.0001         |
| No PND                                   | [REFERENCE]                                                      |                |
| Age, years                               | \$200.22 (195.95, 204.48)                                        | <.0001         |
| Male                                     | -\$807.60 (-868.43, -746.76)                                     | <.0001         |
| Female                                   | [REFERENCE]                                                      |                |

|                         |                                 |        |
|-------------------------|---------------------------------|--------|
| Length of Stay          | \$955.02 (946.08, 963.96)       | <.0001 |
| Area Deprivation Index  | \$8.28 (6.62, 9.95)             | <.0001 |
| Cardiac bundles         | -\$2166.79 (-2250.61, -2082.97) | <.0001 |
| General Surgery Bundles | -\$3071.29 (-3197.06, -2945.53) | <.0001 |
| Orthopedics Bundles     | [REFERENCE]                     |        |
| HCC Score               | \$5332.17 (5299.88, 5364.46)    | <.0001 |
| Discharge Home          | -\$5621.54 (-5694.42, -5548.66) | <.0001 |
| Discharge not Home      | [REFERENCE]                     |        |

| <b>Model 3</b>                   |          |
|----------------------------------|----------|
| <b>Model Fit Characteristics</b> |          |
| AIC                              | 45478337 |
| BIC                              | 45478413 |

Finally, in Model 4 we assessed the relationship between the payments and both the fixed patient (Level 1) and hospital (Level 2) characteristics using multivariable models specifying linear effects for all characteristics. Similarly, this model accounted for the clustering of patients within hospitals using a random effect. Model improvement was assessed using the Akaike's Information Criterion (AIC) and Bayesian Information Criterion (BIC) when the nested models differ in fixed effects. For both of these measures, smaller values represent better fitting models. The results of Model 4 are presented in the manuscript as our primary analysis.

| <b>Model 4</b>                      |                                                                  |                |
|-------------------------------------|------------------------------------------------------------------|----------------|
| <b>Patient and Hospital Effects</b> |                                                                  |                |
| <b>Effect</b>                       | <b><math>\beta</math> Estimate<br/>(95% Confidence Interval)</b> | <b>P Value</b> |
| Intercept                           | -\$4601.06 (-5125.35, -4076.76)                                  | <.0001         |
| PND                                 | \$17275.00 (17058.00, 17491.00)                                  | <.0001         |
| No PND                              | [REFERENCE]                                                      |                |
| Age, years                          | \$200.08 (195.81, 204.35)                                        | <.0001         |
| Male                                | -\$805.74 (-866.57, -744.91)                                     | <.0001         |
| Female                              | [REFERENCE]                                                      |                |
| Length of Stay                      | \$954.66 (945.73, 963.60)                                        | <.0001         |
| Area Deprivation Index              | \$9.43 (7.74, 11.11)                                             | <.0001         |
| Cardiac bundles                     | -\$2167.76 (-2251.64, -2083.88)                                  | <.0001         |
| General Surgery Bundles             | -\$3068.84 (-3194.60, -2943.09)                                  | <.0001         |
| Orthopedics Bundles                 | [REFERENCE]                                                      |                |
| HCC Score                           | \$5332.54 (5300.25, 5364.84)                                     | <.0001         |
| Discharge Home                      | -\$5619.86 (-5692.74, -5546.98)                                  | <.0001         |
| Discharge not Home                  | [REFERENCE]                                                      |                |

|                             |                                  |        |
|-----------------------------|----------------------------------|--------|
| Midwest                     | -\$195.62 (-444.39, 53.14)       | 0.1232 |
| Northeast                   | \$651.78 (376.05, 927.50)        | <.0001 |
| Out of US                   | -\$438.05 (-1212.95, 336.85)     | 0.2678 |
| South                       | -\$1164.36 (-1394.96, -933.77)   | <.0001 |
| West                        | [REFERENCE]                      |        |
| Rural                       | -\$58.41 (-393.83, 277.01)       | 0.7328 |
| Urban                       | [REFERENCE]                      |        |
| Other                       | -\$5612.32 (-30273.00, 19048.00) | 0.6554 |
| Private for profit          | -\$615.58 (-1029.09, -202.06)    | 0.0036 |
| Private not for profit      | -\$1308.79 (-1650.48, -967.09)   | <.0001 |
| Government                  | [REFERENCE]                      |        |
| Academic Medical Center     | \$151.23 (-535.04, 837.51)       | 0.6657 |
| Not Academic Medical Center | [REFERENCE]                      |        |
| Beds                        | -\$0.24 (-0.81, 0.34)            | 0.4199 |

| <b>Model 4</b>                   |          |
|----------------------------------|----------|
| <b>Model Fit Characteristics</b> |          |
| AIC                              | 45478028 |
| BIC                              | 45478168 |
